# Supplementary material for: Diaryldichalcogenide radical cations
Source: Royal Society of Chemistry journal article supplement (doi:10.1039/c4sc02964j), 2014-10-21
Supplement: c4sc02964j1.pdf [file c4sc02964j1.pdf]

## Supporting Information

### Diaryldichalcogenide Radical Cations

Ole Mallow,<sup>a</sup> Monther A. Khanfar,<sup>b,c</sup> Moritz Malischewski,<sup>b</sup> Pamela Finke,<sup>a</sup> Malte Hesse,<sup>a</sup> Enno Lork,<sup>a</sup> Timo Augenstein,<sup>d</sup> Frank Breher,<sup>d</sup> Jeffrey R. Harmer,<sup>e</sup> Nadezhda V. Vasilieva,<sup>f</sup> Andrey Zibarev,<sup>f,g</sup> Artem S. Bogomyakov,<sup>h</sup> Konrad Seppelt<sup>b</sup> and Jens Beckmann<sup>a</sup>

\* Correspondence to Jens Beckmann (E-mail: [j.beckmann@uni-bremen.de](mailto:j.beckmann@uni-bremen.de))

## Experimental

All reactions and manipulations were carried out under an atmosphere of dry argon using standard Schlenk techniques and glove boxes. All solvents were dried over the appropriate desiccants and freshly distilled prior to use.

### Materials and Reagents

The starting materials  $(\text{C}_6\text{F}_5\text{S})_2$  (**13a**),<sup>S1</sup>  $(\text{C}_6\text{F}_5\text{Se})_2$  (**13b**),<sup>S2</sup>  $(\text{C}_6\text{F}_5\text{Te})_2$  (**13c**),<sup>S3</sup>  $(2,6\text{-Mes}_2\text{C}_6\text{H}_3\text{Te})_2$  (**16a**)<sup>21</sup> were prepared according to literature procedures, whereas  $\text{AsF}_5$  was obtained by fluorination of elemental As. The  $\text{SbF}_5$  was purchased from commercial suppliers and distilled once prior to use. The  $[\text{NO}][\text{SbF}_6]$  was obtained from Sigma-Aldrich and used as received.

### Instrumentation and Measurement

**CYCLIC VOLTAMETRY.** The CV measurements on 0.5 mM solutions of **16a-16c** in  $\text{CH}_2\text{Cl}_2$  were performed with a PG 310 USB potentiostat (HEKA Elektronik) at 298 K in an argon atmosphere at a stationary Pt electrode ( $S = 0.08 \text{ cm}^2$ ) with 0.1 M  $n\text{-Bu}_4\text{NBF}_4$  as a supporting electrolyte. The sweep rates were  $0.1 < v < 1.2 \text{ V}\cdot\text{s}^{-1}$ . Peak potentials are quoted with reference to a saturated calomel electrode (SCE). For **16a-16c**, oxidation peaks were diffusion-controlled, i.e.  $i_p v^{-0.5} = \text{const.}$ , where  $i_p$  is the peak current (see also Figure S1 and Table S1).

**UV-VIS SPECTROSCOPY.** UV-vis measurements were carried out using a THERMO-Scientific Genesys 10S at a range between 200 and 800 nm (see also Figures S2-S7).

**ELECTROSPRAY MASS SPECTROMETRY.** The ESI MS spectra were obtained with a Bruker Esquire-LC ion trap MS. Acetonitrile solutions ( $c = 1 \cdot 10^{-6} \text{ mol L}^{-1}$ ) were injected directly into the spectrometer at a flow rate of  $3 \mu\text{L min}^{-1}$ . Nitrogen was used both as a drying gas and for nebulization with flow rates of approximately  $5 \text{ L min}^{-1}$  and a pressure of 5 psi, respectively. Pressure in the mass analyser region was usually about  $1 \cdot 10^{-5} \text{ mbar}$ . Spectra were collected for one minute and averaged. The nozzle-skimmer voltage was adjusted individually for each measurement (see Figure S8).

**ELECTROLYTIC CONDUCTIVITY.** All conductivity measurements have been carried out with a WTW Cond 330i at  $25^\circ\text{C}$ .

**NMR SPECTROSCOPY.** The  $^1\text{H}$ ,  $^{13}\text{C}$ ,  $^{77}\text{Se}$  and  $^{125}\text{Te}$  NMR spectra were recorded at r.t. (unless otherwise stated) using a Bruker Avance-360 spectrometer and are referenced to  $\text{Me}_2\text{Se}$  ( $^{77}\text{Se}$ ) and  $\text{Me}_2\text{Te}$  ( $^{125}\text{Te}$ ). As secondary references, solutions of 100 mg samples of  $\text{Ph}_2\text{Se}_2$  ( $\delta$  ( $^{77}\text{Se}$ ) 464.0 ppm) in  $\text{CDCl}_3$  and  $\text{Te}(\text{OH})_6$  ( $\delta$  ( $^{125}\text{Te}$ ) 707.0 ppm) in  $\text{D}_2\text{O}$  were used.

**EPR SPECTROSCOPY.** X-band CW EPR experiments were performed on a Bruker BioSpin GmbH E500 spectrometer equipped with a high sensitivity Bruker probe head, and Q-band pulse EPR experiments were carried out on a Bruker X-/Q E580 spectrometer. Both instruments were equipped with Oxford Instruments helium-flow cryostats. The field was calibrated with DPPH (2,2-diphenyl-1-picrylhydrazyl,  $g = 2.0036$ ). The X-band CW EPR spectra were recorded as follows: **17a**: 35 K, 9.400457 GHz, modulation frequency 100 kHz, modulation amplitude 0.05 mT, microwave power 0.003157 mW (48 dB); **17b**: 35 K, 9.401650 GHz, modulation frequency 100 kHz, modulation amplitude 0.2 mT, microwave power 1.992 mW (20 dB); **17c**: 35 K, 9.402240 GHz, modulation frequency 100 kHz, modulation amplitude 0.3 mT, microwave power 9.985 mW (13 dB). Q-band FID-detected field-sweep EPR spectra for **17a** (**17b**) were recorded at 34.1923 GHz, 40 K (34.2476 GHz, 20 K) by integrating over the FID created from a single pulse of length 1000 ns (800 ns). The Q-band (34.1546 GHz) echo-detected field-sweep EPR spectrum of **17c** was recorded at 10 K by integrating the echo (fwhh) from the two-pulse echo sequence  $\pi/2 - \tau - \pi - \tau - \text{echo}$ , with  $t_{\pi/2} = 24 \text{ ns}$ ,  $t_\pi = 48 \text{ ns}$ , and  $\tau = 200 \text{ ns}$ . Q-band Davies ENDOR spectra were recorded at 40 K for **17a**, 12.5 K or **17b** and 10 K for **17c**. All ENDOR data were acquired using the microwave pulse sequence  $\pi - T - \pi/2 - \tau - \pi - \tau - \text{echo}$  with mw pulses of lengths  $t_{\pi/2} = 40 \text{ ns}$  and  $t_\pi = 80 \text{ ns}$ , with  $\tau = 240 \text{ ns}$ . During time  $T = 20 \mu\text{s}$  a radio frequency (rf) pulse of  $19 \mu\text{s}$  was applied stochastically using 80% gain of a 150 W Applied Engineering rf amplifier. The field-sweep EPR and ENDOR data were simulated with the program EasySpin using the functions pepper and salt, respectively (see also Figures S9-12 and Tables S2 and S3).<sup>S4</sup>

**MAGNETIC MEASUREMENTS.** The magnetic measurements (Figure S12) on **17a-c** were performed with an MPMSXL SQUID magnetometer (Quantum Design) in the temperature range 2-300 K with magnetic field of up to 5 kOe. Samples of complexes was placed in small quartz tubes with teflon caps in glovebox and then quickly moved to an airlock and purged with helium. None of complexes exhibited any field dependence of molar magnetization at low temperatures. Diamagnetic corrections were made using the Pascal constants. The effective magnetic moment was calculated as  $\mu_{\text{eff}}(T) = [(3k/N_A \mu_B^2) \chi T]^{1/2} \approx (8 \chi T)^{1/2}$  (see also Figure S13).

**MICROANALYSIS.** The CHN analyses were obtained using a EuroVector EA3000.

**X-RAY CRYSTALLOGRAPHY.** Intensity data were collected on a Bruker Smart 200 diffractometer (**14a**, **14b**, **17a**) and a Siemens P4 diffractometer (**16a**, **17b**, **17c**) using graphite-monochromated  $\text{Mo-K}\alpha$  (0.7107 Å) radiation. All structures were solved by direct methods and refined based on  $F^2$  by use of the SHELX program package.<sup>S5</sup> All non-hydrogen atoms were refined using anisotropic displacement parameters. Hydrogen atoms attached to carbon atoms were included in geometrically calculated positions using a riding model. Crystal and refinement data are collected in Table S4. Figures were created using DIAMOND.<sup>S6</sup> The molecular of **16a** is shown in Figures S14. Crystallographic data (excluding structure factors) for the structural analyses have been deposited with the Cambridge Crystallographic Data Centre.

Copies of this information may be obtained free of charge from The Director, CCDC, 12 Union Road, Cambridge CB2 1EZ, UK (Fax: +44-1223-336033; e-mail: [deposit@ccdc.cam.ac.uk](mailto:deposit@ccdc.cam.ac.uk) or <http://www.ccdc.cam.ac.uk>).

**COMPUTATIONAL CHEMISTRY.** Several sets of computations were performed. Calculation of the EPR parameters were performed using the ORCA program package at the BP86/def2-TZVP level including the ZORA approximation.<sup>S7</sup> The calculations were performed on previously optimized structures using the TURBOMOLE program package.<sup>S8</sup> The geometries were optimized at the (RI)-B3LYP level in the def2-TZVP basis.<sup>S9</sup> The coordinates of the solid state structures were chosen as starting geometry. Since for these calculations the whole, i.e. non-simplified molecules have been taken into account, the optimized structures were not checked for minima by 2<sup>nd</sup> derivative (frequency) calculations due to the large number of atoms. The conformational analysis was carried out with the Gaussian09 program.<sup>S10</sup> The methylated *m*-terphenyl-substituents have been simplified to phenyl groups in order to reduce the number of electrons, but also to reduce the number of rotational isomers of the methyl groups which would complicate the finding of the ground state configuration. The pentafluorophenyl compounds have been calculated as such. At first some well-established methods have been tested. It turned out that the MP2 *ab initio* method was too time consuming, frequency calculations took months or did not converge. The DFT Becke3LYP method worked reliably. Alternatively user defined models as proposed for radicals has been tested by using a mixed ratio of exact and DFT energy terms of 4.428:0.572 with the MPW1PW91 hybrid functional.<sup>S11</sup> The energy separation and overall geometry of the dichalcogenide radical cations in C<sub>2</sub> and C<sub>s</sub> symmetry did not change, so that all further calculations have been performed with the Becke3LYP functional. On the neutral diaryl dichalcogenides the choice of the basis sets has been tested, since their molecular structures are known from X-ray crystallography. The cc-pvTZ basis set is superior to 6-311+G(d,p) in reproducing bond distances. Remaining large differences between experimental and calculated structure are found only for the C-S-S-C and C-Se-Se-C dihedral angles of the fluorinated phenyl derivatives. Basis sets used for selenium are all electron 6-311+G(d,p) and cc-pvTZ, and also a core potential for 28 electron and a 14s10p2d1f[3s3d2p1f] basis set. Te has been represented by a 46 electron core potential and a 15s11p3d1f[3s3p2d1f] basis set.<sup>S12</sup> Wiberg bond indices (WBIs) were calculated with NBO 5.9 as implemented in Gaussian09.<sup>37</sup> The <sup>77</sup>Se and <sup>125</sup>Te NMR chemical shifts were computed with the GIAO method using the cc-pVTZ basis set for C and H atoms as well as an IGLO-II type basis set for Se and Te (see also Figure S15 and S16 as well as Tables S5-9).<sup>S13</sup>

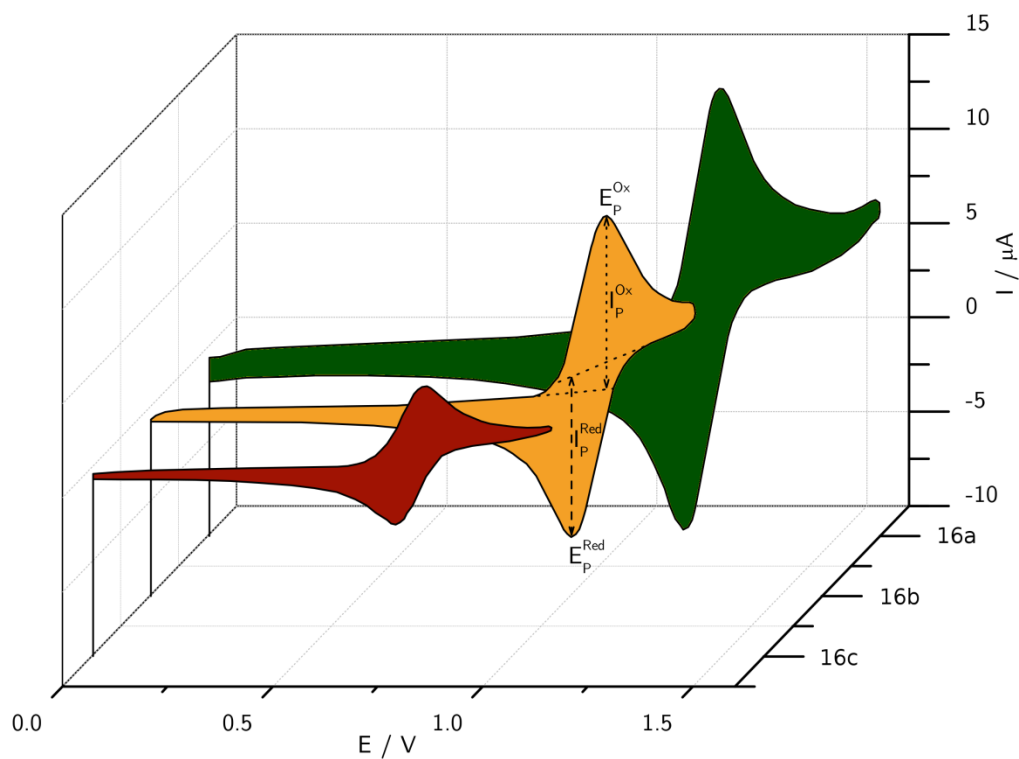

**Figure S1.** Cyclic voltammograms of **16a-c** at Pt anode in  $\text{CH}_2\text{Cl}_2$  / 0.1 M  $n\text{-Bu}_4\text{NBF}_4$  at  $v = 0.1 \text{ V s}^{-1}$  and  $c = 5 \cdot 10^{-4} \text{ mol l}^{-1}$ .

**Table S1.** Results of the cyclic voltammetry investigations of **16a-c** ( $v = 0.1 \text{ V s}^{-1}$ ,  $c = 5 \cdot 10^{-4} \text{ mol l}^{-1}$ ).

| Compound   | $E_p^{\text{Ox}} / \text{V}$ | $E_p^{\text{Red}} / \text{V}$ | $I_p^{\text{Ox}} / \mu\text{A}$ | $I_p^{\text{Red}} / \mu\text{A}$ |
|------------|------------------------------|-------------------------------|---------------------------------|----------------------------------|
| <b>16a</b> | 1.22                         | 1.15                          | 13.2                            | -11.8                            |
| <b>16b</b> | 1.09                         | 1.01                          | 9.8                             | -8.4                             |
| <b>16c</b> | 0.79                         | 0.71                          | 4.4                             | -3.6                             |

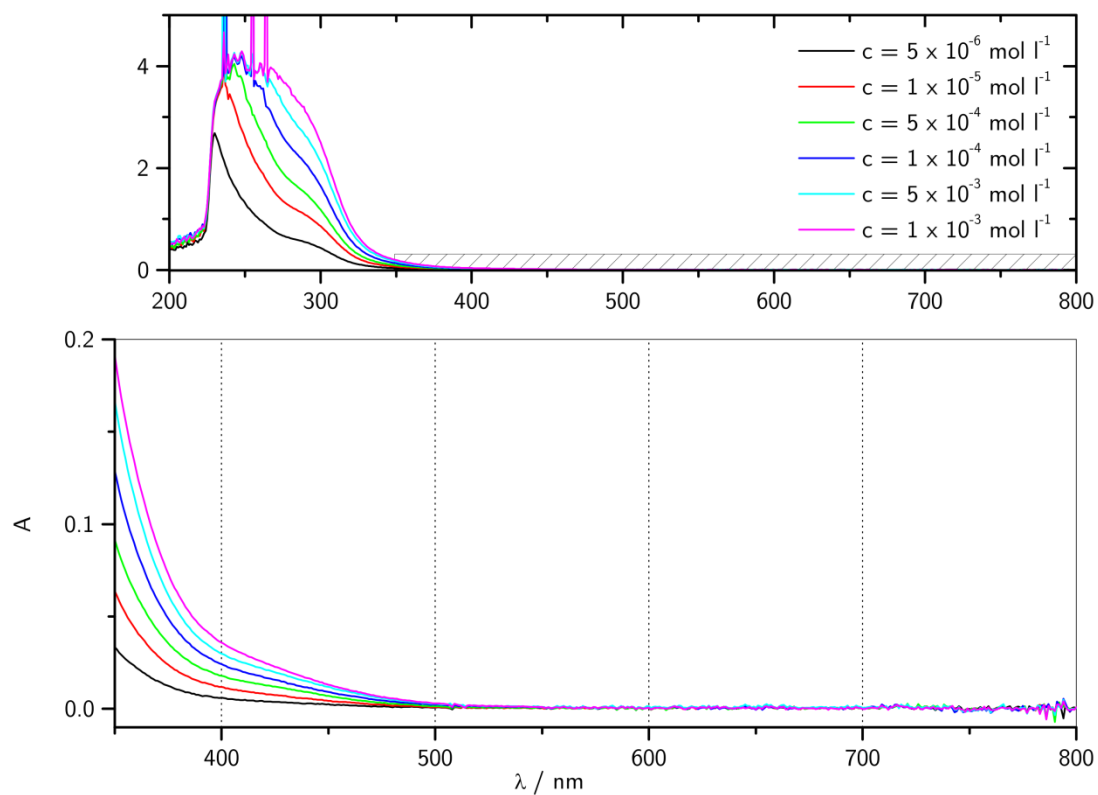

**Figure S2.** UV/vis spectra of **16a** at various concentrations in  $\text{CH}_2\text{Cl}_2$ .

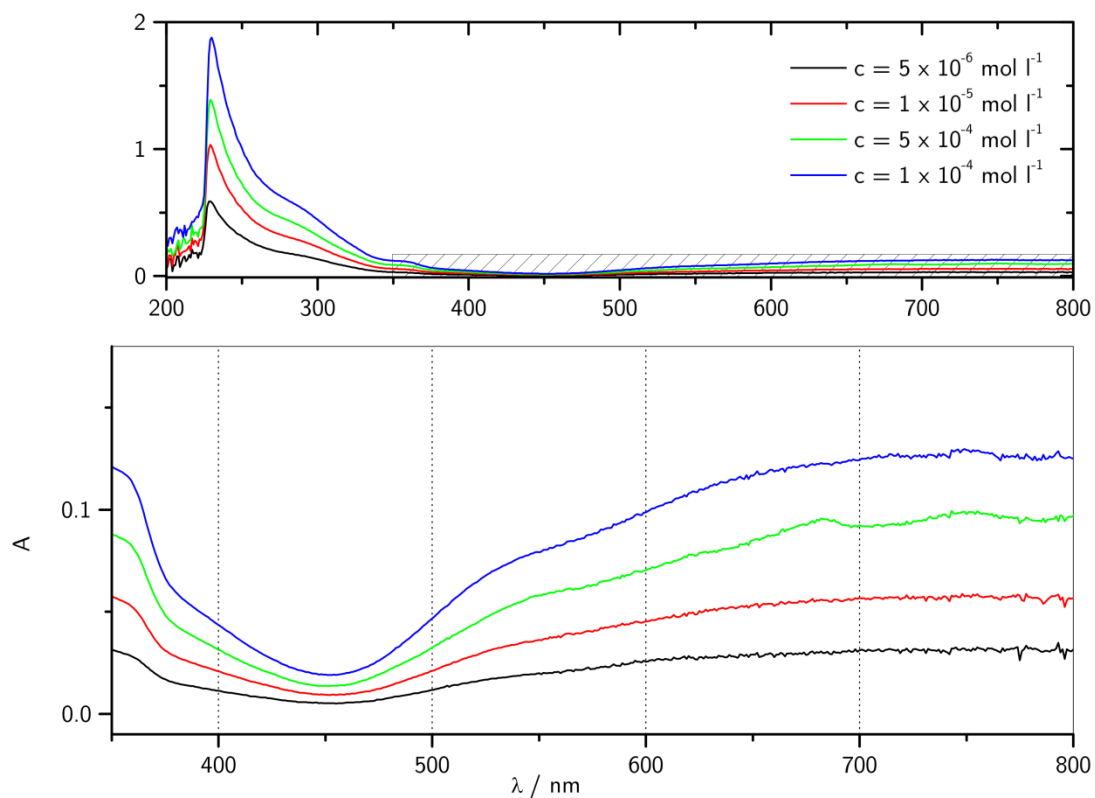

**Figure S3.** UV/vis spectra of **17a** at various concentrations in  $\text{CH}_2\text{Cl}_2$ .

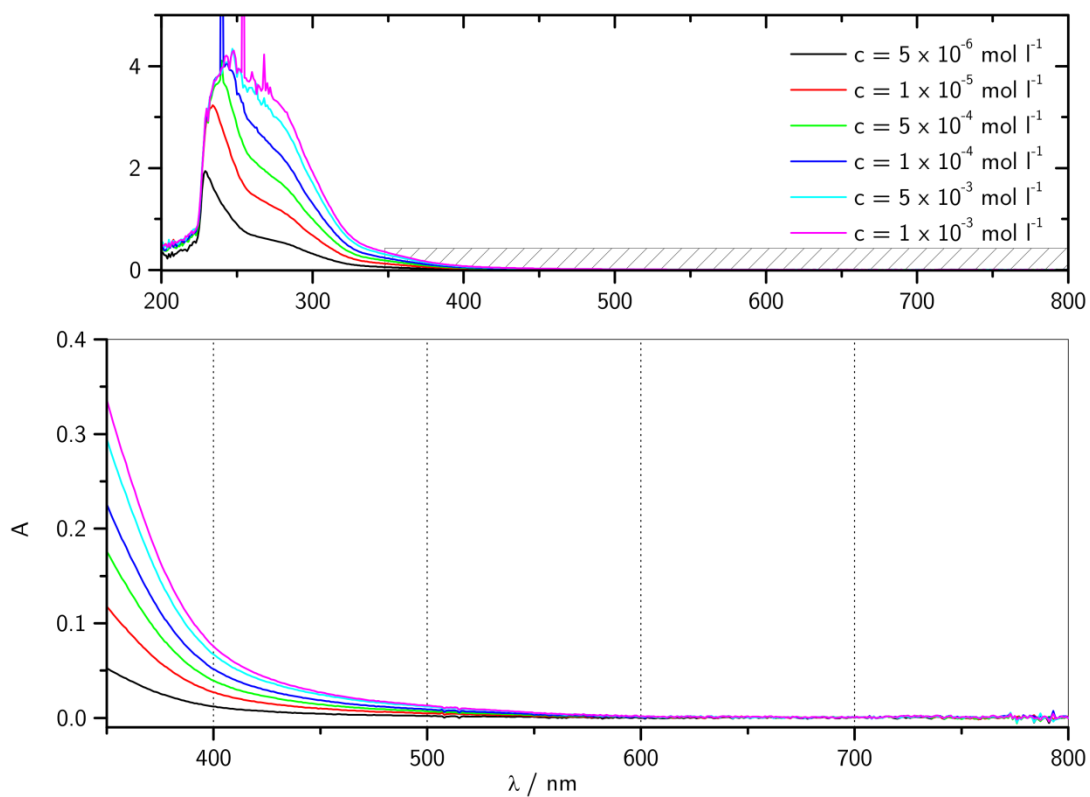

**Figure S4.** UV/vis spectra of **16b** at various concentrations in  $\text{CH}_2\text{Cl}_2$ .

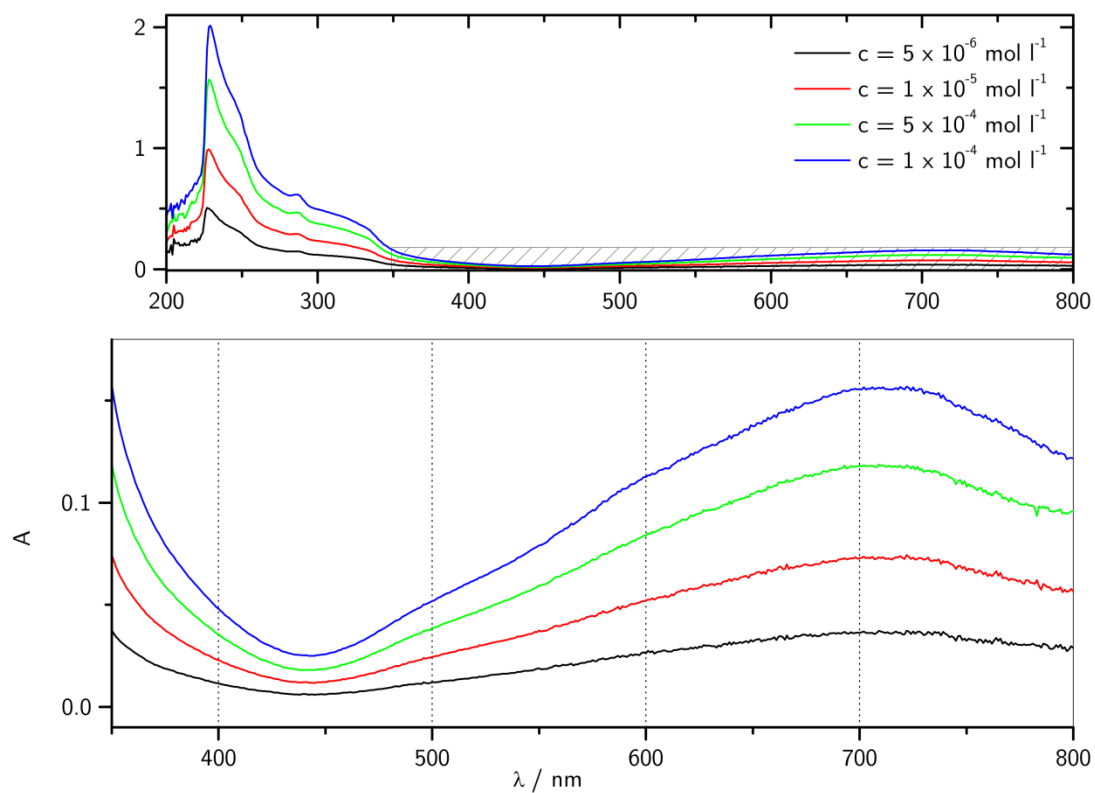

**Figure S5.** UV/vis spectra of **17b** at various concentrations in  $\text{CH}_2\text{Cl}_2$ .



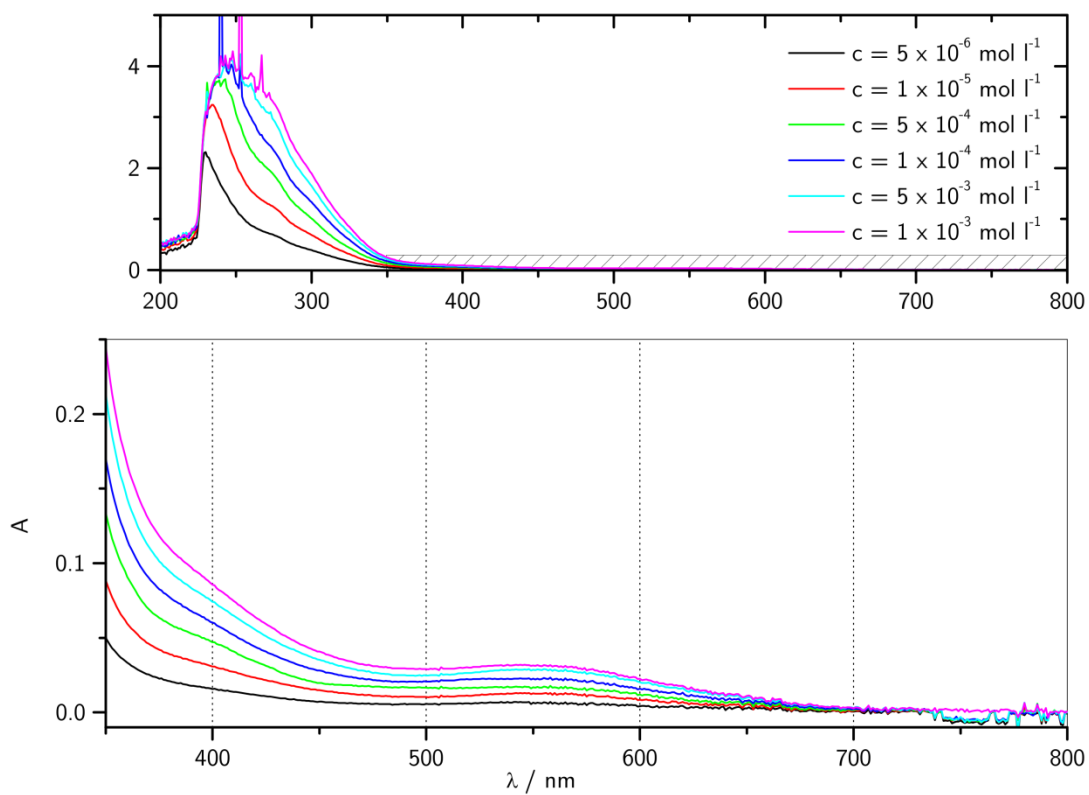

**Figure S6.** UV/vis spectra of **16c** at various concentrations in  $\text{CH}_2\text{Cl}_2$ .

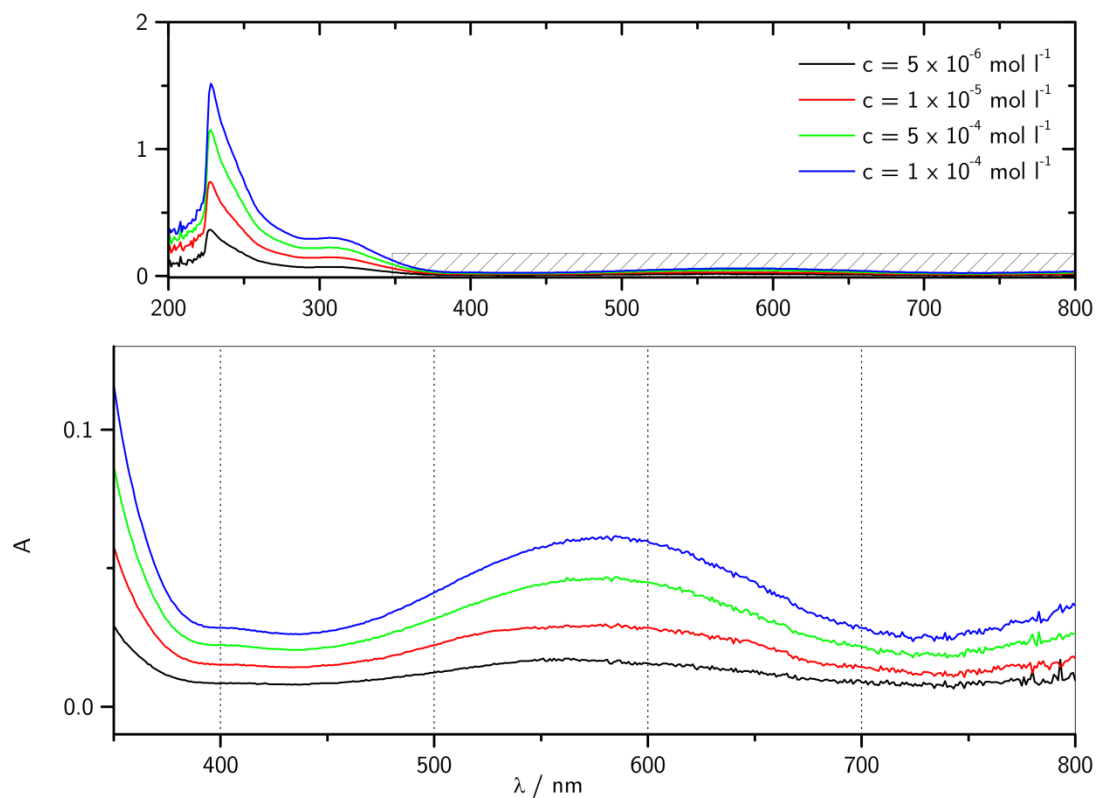

**Figure S7.** UV/vis spectra of **17c** at various concentrations  $\text{CH}_2\text{Cl}_2$ .

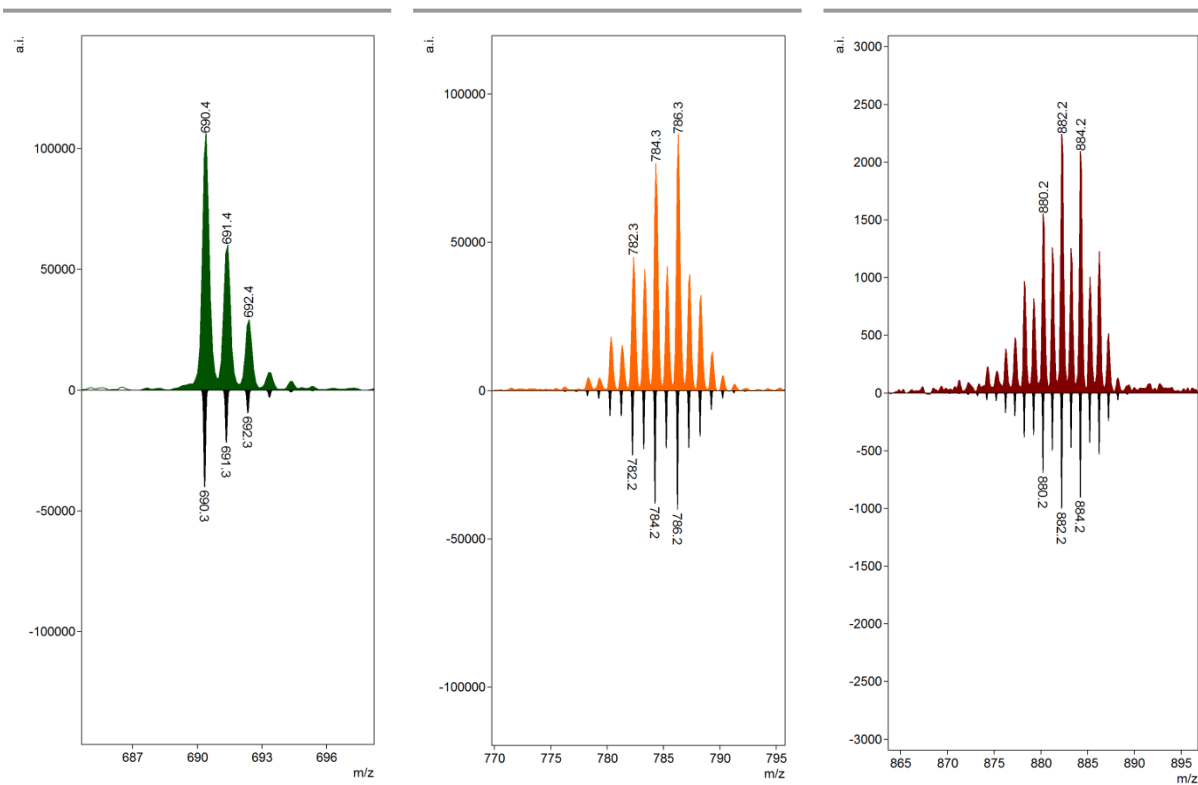

**Figure S8.** ESI MS spectra (positive mode, MeCN) of **17a-c** showing the experimental (above) and simulated (below) mass clusters of the radical cations.

**Table S2:** Experimental and DFT (in parentheses) EPR parameters for **17a-c**.

| Parameter                     | Principal values / MHz                                  | Euler angles / deg.                              | $\rho_s$               | $\rho_p$               | $\rho_{\text{total}}$  |
|-------------------------------|---------------------------------------------------------|--------------------------------------------------|------------------------|------------------------|------------------------|
| <b>17a</b>                    |                                                         |                                                  |                        |                        |                        |
| <i>g</i>                      | 2.0014, 2.0115, 2.0285<br>(2.0022, 2.0107, 2.0213)      | (0,0,0)                                          | -                      | -                      | -                      |
| <i>A</i> ( <sup>1</sup> H)    | -3.0, -7.2, -11.0<br>(-1.8, -5.8, -8.5)                 | (3.1, 93.1, 92.8)                                | (-0.00131)             | n.a.                   | (-0.00131)             |
| <i>L</i>                      | 7.5, 7.5, 10 (X-band) / 9, 9, 22 (Q-band)               |                                                  | -                      | -                      | -                      |
| <b>17b</b>                    |                                                         |                                                  |                        |                        |                        |
| <i>g</i>                      | 1.9956, 2.0438, 2.1543<br>(2.0021, 2.0452, 2.1165)      | (0,0,0)                                          | -                      | -                      | -                      |
| <i>A</i> ( <sup>77</sup> Se)  | -50, -100, 465<br>(-106, -116, 306)                     | (-2.0, 88.5, 0.2)                                | (0.00259)              | (0.33175)              | (0.33228)              |
| <i>A</i> ( <sup>77</sup> Se)  | -80, -115, 610<br>(-135, -140, 407)                     | (4.0, 91.0, -0.2)                                | (0.00332)              | (0.39967)              | (0.40193)              |
| <i>A</i> ( <sup>1</sup> H)    | -1.8, -4.3, -6.4<br>(-1.2, -4.2, -6.1)                  | (-1.3, 85.0, 85.3)                               | (-0.00080)             | n.a.                   | (-0.00080)             |
| <i>L</i>                      | 15, 18, 40 (X-band) / 15, 30, 120 (Q-band)              |                                                  | -                      | -                      | -                      |
| <b>17c</b>                    |                                                         |                                                  |                        |                        |                        |
| <i>g</i>                      | 1.9542, 2.0411, 2.4566<br>(2.0021, 2.0876, 2.3688)      | (0,0,0)                                          | -                      | -                      | -                      |
| <i>A</i> ( <sup>127</sup> Te) | 300, 350, -1000<br>(350, 370, -720)<br>(352, 372, -724) | (-179.6, 82.2, -179.0) (-<br>179.6, 97.7, 179.0) | (0.00085)<br>(0.00089) | (0.39122)<br>(0.39312) | (0.38784)<br>(0.38970) |
| <i>A</i> ( <sup>1</sup> H)    | - , - , -3.8<br>(-0.6, -2.6, -3.8)                      | (-174.9, 94.8, -110.3)                           | (-0.00042)             | n.a.                   | (-0.00042)             |
| <i>L</i>                      | 30, 30, 90 (X-band) / 120, 120, 220 (Q-band)            |                                                  | -                      | -                      | -                      |

Listed are the principal *g*-values *g*, principal hyperfine values *A* (MHz) and their corresponding Euler angles (degrees), X- and Q-band linewidths *L* (MHz) for the EPR simulations, and the spin densities in s-type  $\rho_s$  and p-type  $\rho_p$  orbitals and their sum. All simulations used Euler angles from the DFT calculations, and the sign of the experimental hyperfine couplings are assigned to be consistent with the DFT results (experiment data provide only absolute values).

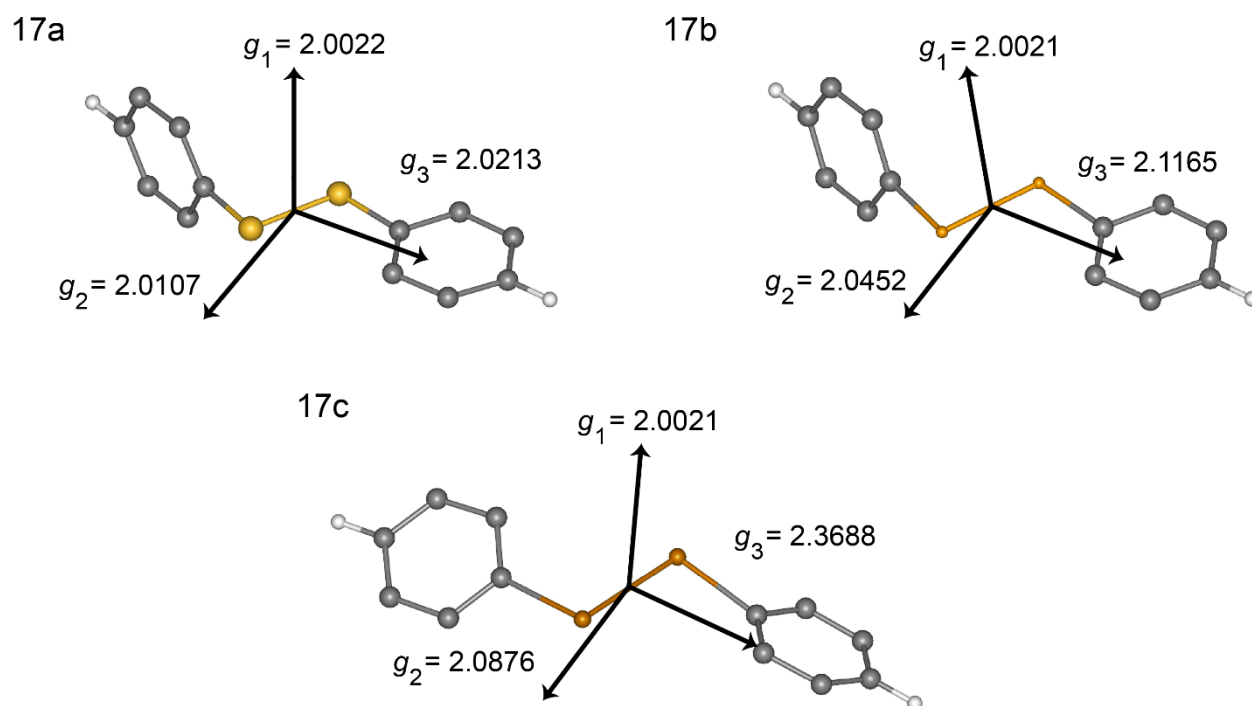

**Figure S9.** Orientation of the g-matrix axes in the Molecular frame for radicals **17a**, **17b** and **17c** (see also Table S3).

**Table S3.** g-matrix principal axis vectors  $g_1$ ,  $g_2$ ,  $g_3$  for the radicals **17a**, **17b** and **17c** in the molecular frame (defined by the selected atom coordinates below) from the DFT calculations (see also Figure S9).

| <b>17a</b> |         |         |         | <b>17b</b> |         |         |         | <b>17c</b> |         |         |         |
|------------|---------|---------|---------|------------|---------|---------|---------|------------|---------|---------|---------|
| $g_1$      | -0.186  | -0.9471 | -0.2616 | $g_1$      | -0.081  | -0.8945 | -0.4396 | $g_1$      | 0.737   | 0.6759  | 0.0049  |
| $g_2$      | 0.9753  | -0.2103 | 0.0681  | $g_2$      | 0.9745  | -0.1637 | 0.1536  | $g_2$      | 0.6608  | -0.722  | 0.205   |
| $g_3$      | -0.1195 | -0.2424 | 0.9628  | $g_3$      | -0.2094 | -0.416  | 0.885   | $g_3$      | 0.1421  | -0.1479 | -0.9787 |
| C          | 0.2095  | 2.3735  | -3.6619 | C          | 3.0536  | 1.6446  | -3.4331 | C          | 0.7929  | -0.3842 | -3.2613 |
| C          | 0.5682  | 1.9271  | -2.3727 | C          | 2.6871  | 1.0312  | -2.2222 | C          | 0.7976  | -0.6965 | -4.6407 |
| C          | -0.2313 | 1.4675  | -4.6391 | C          | 2.071   | 2.0847  | -4.3338 | Te         | -0.6381 | 1.0407  | -0.7277 |
| C          | 0.448   | 0.5399  | -2.1028 | C          | 1.3021  | 0.8698  | -1.9341 | C          | -0.3361 | 0.3089  | -2.7521 |
| S          | 1.0087  | -0.0664 | -0.4977 | Se         | 1.0865  | -0.0122 | -0.2234 | Te         | 0.9712  | -0.729  | 0.6702  |
| C          | -0.3123 | 0.0951  | -4.3543 | C          | 0.7119  | 1.9123  | -4.03   | C          | -0.2648 | -0.3357 | -5.4815 |
| C          | 0.0362  | -0.4019 | -3.0813 | C          | -1.3451 | -0.5724 | 4.3938  | C          | -0.3115 | 0.8156  | 3.2128  |
| C          | 0.5197  | -0.8801 | 2.838   | C          | -1.1353 | -1.9505 | 4.557   | C          | -1.4203 | 0.6883  | -3.5901 |
| S          | -0.8745 | 0.0188  | 0.4768  | C          | -1.3387 | 0.0071  | 3.1079  | C          | -1.3682 | 0.3535  | -4.9582 |
| C          | 0.4362  | -1.1476 | 4.2202  | C          | 0.2881  | 1.301   | -2.8292 | C          | 0.2636  | -0.3737 | 2.6947  |
| C          | -0.665  | -0.4247 | 2.1928  | C          | -0.9301 | -2.7751 | 3.4403  | C          | -0.6125 | 0.8455  | 4.5943  |
| C          | -0.7612 | -0.988  | 4.9354  | C          | -1.1067 | -0.8439 | 1.9986  | C          | 0.5338  | -1.4959 | 3.5248  |
| C          | -1.8971 | -0.2632 | 2.9001  | C          | -0.9201 | -2.245  | 2.1318  | C          | -0.353  | -0.251  | 5.4286  |
| C          | -1.9207 | -0.5512 | 4.2745  | Se         | -1.2503 | -0.0166 | 0.2375  | C          | 0.2164  | -1.4161 | 4.8956  |

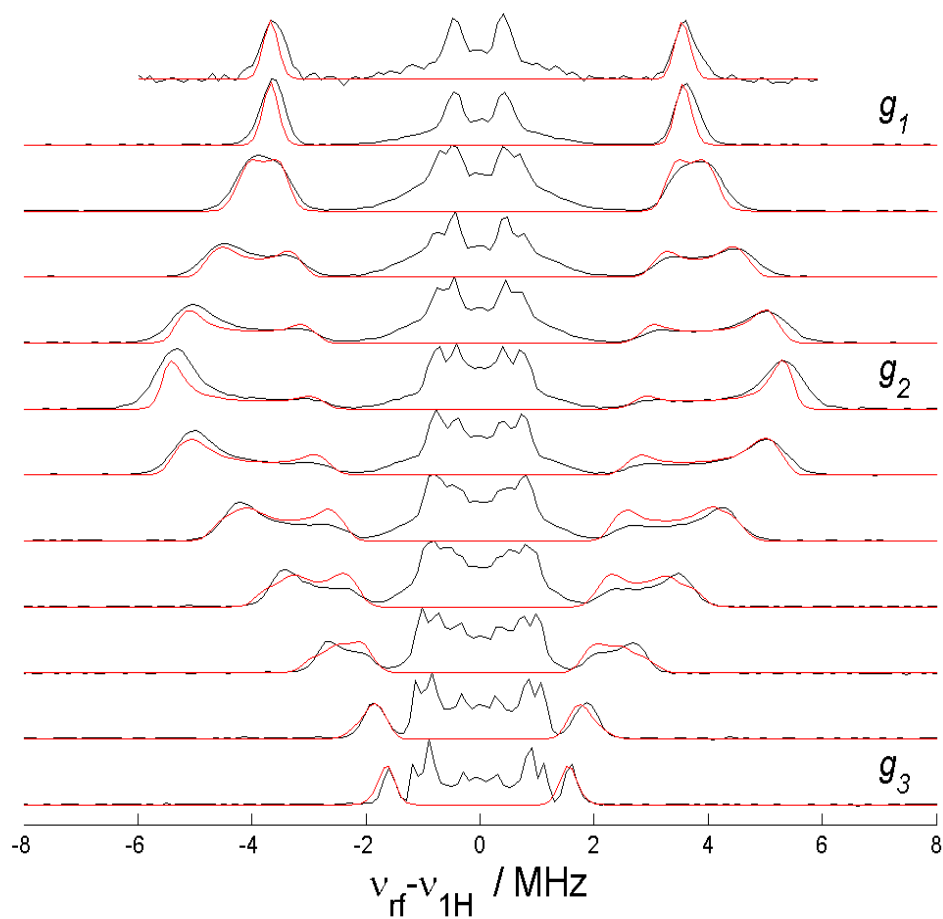

**Figure S10.**  $^1\text{H}$  Q-band (34.1922 GHz) Davies ENDOR spectra recorded at 40 K of **17a** (black) and simulations (red) for the largest proton hyperfine coupling (the one resolved in the EPR spectra). Spectra have been centred around the  $^1\text{H}$  Larmor frequency  $\nu_{1\text{H}}$ . The measurement field positions from bottom ( $g_3$ ) to top ( $g_1$ ) are: 1204.7 ( $\sim g_3$ ), 1205.7, 1207.7, 1209.7, 1211.7, 1213.7, 1214.5 ( $\sim g_2$ ), 1215.6, 1217.2, 1218.9, 1220.6 ( $\sim g_1$ ), 1221.0 mT.

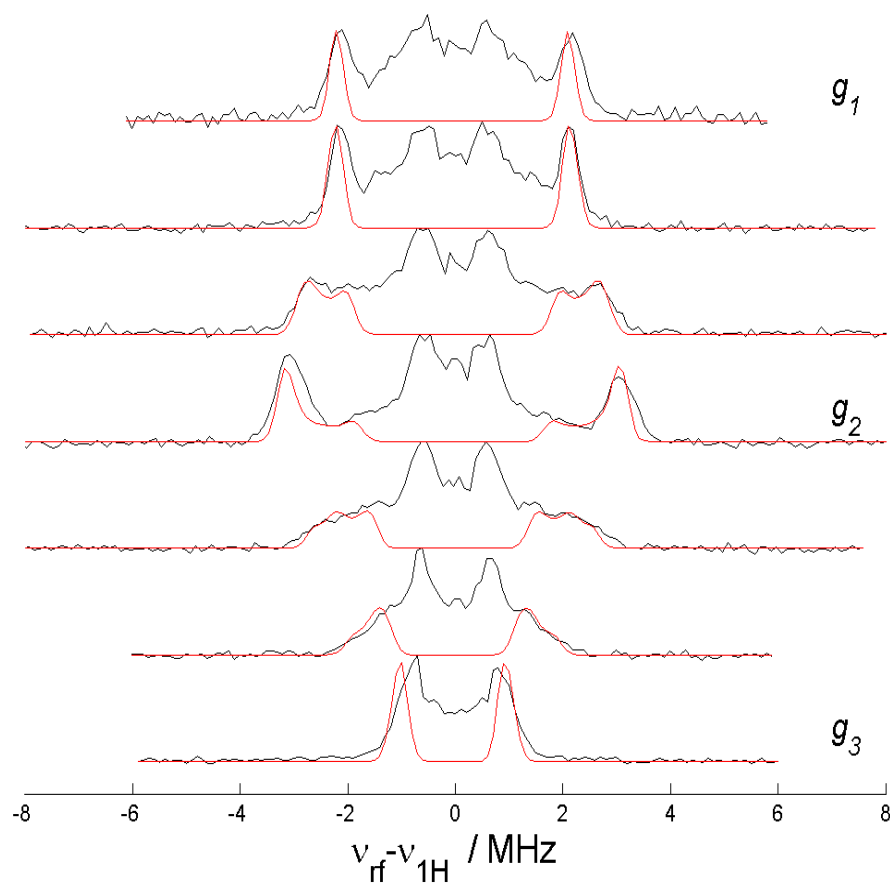

**Figure S11.**  $^1\text{H}$  Q-band (34.2443 GHz) Davies ENDOR spectra recorded at 12.5 K for **17b** (black) and simulations (red) for the largest proton hyperfine coupling. Spectra have been centred around the  $^1\text{H}$  Larmor frequency  $\nu_{1\text{H}}$ . The measurement field positions from bottom ( $g_3$ ) to top ( $g_1$ ) are: 1139.2 ( $\sim g_3$ ), 1158.3, 1177.4, 1197.2 ( $\sim g_2$ ), 1207.2, 1223.7, 1228.7 mT ( $\sim g_1$ ).

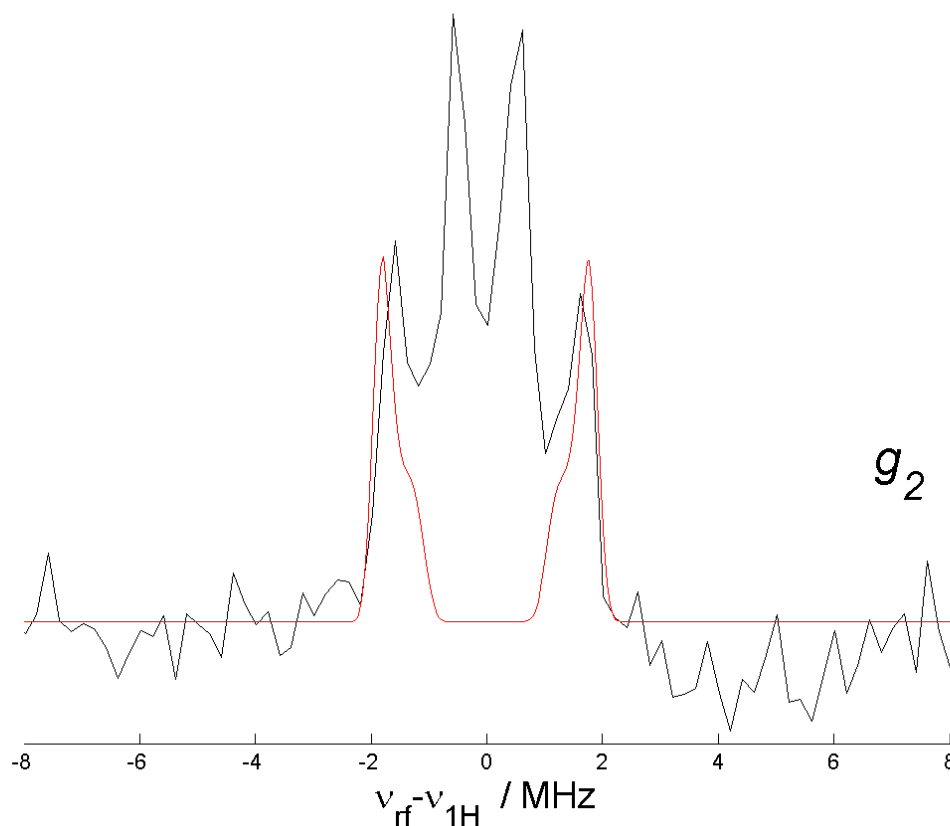

**Figure S12.**  $^1\text{H}$  Q-band (34.1545 GHz) Davies ENDOR spectrum recorded at 10 K of **17c** (black) and simulation (red) for the largest proton coupling. The observer position was close to  $g_2$  ( $B_0 = 1195.1$  mT) and shows the largest coupling is  $|A_{\text{max}}| = 3.8$  MHz.



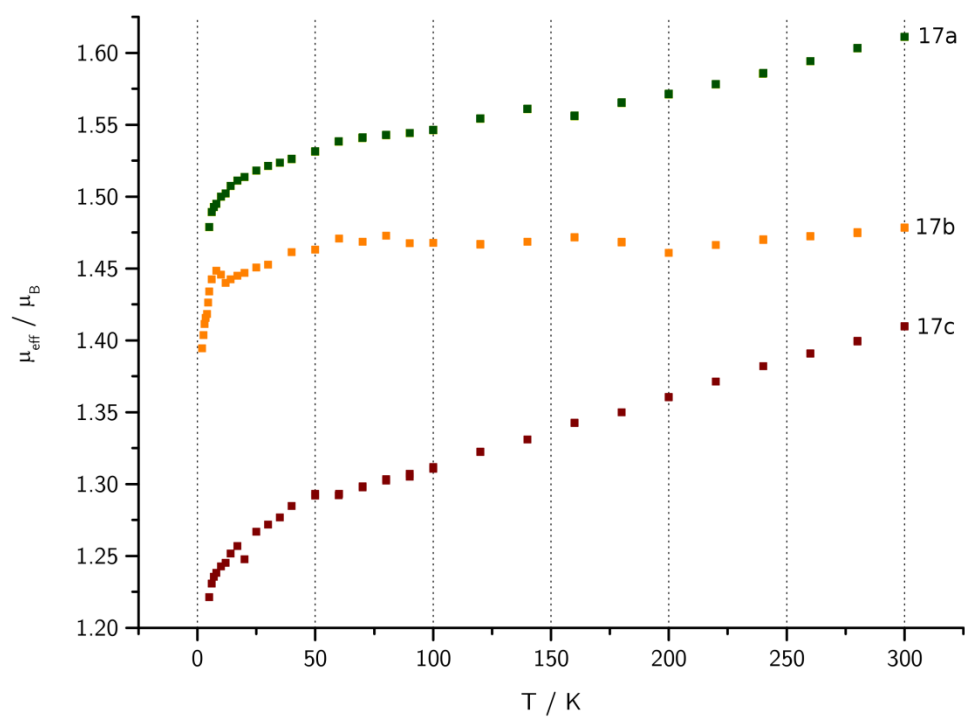

**Figure S13.** Temperature dependences of effective magnetic moment  $\mu_{\text{eff}}$  of **17a-c**.

**Table S4.** Crystal data and structure refinement of **[14b][As<sub>2</sub>F<sub>11</sub>]**, **16a**, **[17a-c][SbF<sub>6</sub>]**,

|                                                                          | <b>[14a][Sb<sub>2</sub>F<sub>11</sub>]</b>                       | <b>[14b][As<sub>2</sub>F<sub>11</sub>]</b>                        | <b>16a</b>                                                        |
|--------------------------------------------------------------------------|------------------------------------------------------------------|-------------------------------------------------------------------|-------------------------------------------------------------------|
| Formula                                                                  | C <sub>12</sub> F <sub>21</sub> S <sub>2</sub> Sb <sub>2</sub>   | C <sub>12</sub> As <sub>2</sub> F <sub>21</sub> Se <sub>2</sub>   | C <sub>48</sub> H <sub>50</sub> S <sub>2</sub>                    |
| Formula weight, g mol <sup>-1</sup>                                      | 850.74                                                           | 850.88                                                            | 691.00                                                            |
| Crystal system                                                           | monoclinic                                                       | triclinic                                                         | monoclinic                                                        |
| Crystal size, mm                                                         | 0.2×0.05×0.02                                                    | 0.6×0.4×0.02                                                      | 0.9×0.8×0.6                                                       |
| Space group                                                              | P2 <sub>1</sub> /n                                               | P-1                                                               | P2 <sub>1</sub> /n                                                |
| <i>a</i> , Å                                                             | 12.029(4)                                                        | 8.5406(18)                                                        | 15.695(3)                                                         |
| <i>b</i> , Å                                                             | 12.276(6)                                                        | 8.5891(18)                                                        | 15.264(2)                                                         |
| <i>c</i> , Å                                                             | 14.440(7)                                                        | 14.093(3)                                                         | 16.274(2)                                                         |
| $\alpha$ , °                                                             | 90.00                                                            | 84.900(5)                                                         | 90                                                                |
| $\beta$ , °                                                              | 97.662(14)                                                       | 84.781(5)                                                         | 93.450(10)                                                        |
| $\gamma$ , °                                                             | 90.00                                                            | 88.091(5)                                                         | 90                                                                |
| <i>V</i> , Å <sup>3</sup>                                                | 2113.3(16)                                                       | 1025.1(4)                                                         | 3892(1)                                                           |
| <i>Z</i>                                                                 | 4                                                                | 2                                                                 | 4                                                                 |
| $\rho_{\text{calcd}}$ , Mg m <sup>-3</sup>                               | 2.674                                                            | 2.757                                                             | 1.179                                                             |
| $\mu$ (Mo <i>K</i> $\alpha$ ), mm <sup>-1</sup>                          | 2.938                                                            | 7.000                                                             | 0.169                                                             |
| <i>F</i> (000)                                                           | 1580                                                             | 790                                                               | 1480                                                              |
| $\theta$ range, deg                                                      | 2.07 to 26.13                                                    | 2.38 to 30.60                                                     | 2.51 to 27.50                                                     |
| Index ranges                                                             | -14 ≤ <i>h</i> ≤ 14<br>-15 ≤ <i>k</i> ≤ 16<br>-1 ≤ <i>l</i> ≤ 17 | -11 ≤ <i>h</i> ≤ 12<br>-12 ≤ <i>k</i> ≤ 12<br>-20 ≤ <i>l</i> ≤ 17 | -19 ≤ <i>h</i> ≤ 20<br>-19 ≤ <i>k</i> ≤ 13<br>-21 ≤ <i>l</i> ≤ 21 |
| No. of reflns collected                                                  | 4165                                                             | 16040                                                             | 10766                                                             |
| Completeness to $\theta_{\text{max}}$                                    | 99.0%                                                            | 96.8%                                                             | 99.7%                                                             |
| No. indep. Reflns                                                        | 4165                                                             | 6115                                                              | 8906                                                              |
| No. obsd reflns with ( <i>I</i> > 2 $\sigma$ ( <i>I</i> ))               | 2858                                                             | 4844                                                              | 5949                                                              |
| No. refined params                                                       | 335                                                              | 334                                                               | 463                                                               |
| GooF ( <i>F</i> <sup>2</sup> )                                           | 1.037                                                            | 1.020                                                             | 1.013                                                             |
| <i>R</i> <sub>1</sub> ( <i>F</i> ) ( <i>I</i> > 2 $\sigma$ ( <i>I</i> )) | 0.0469                                                           | 0.0264                                                            | 0.0609                                                            |
| <i>wR</i> <sub>2</sub> ( <i>F</i> <sup>2</sup> ) (all data)              | 0.1395                                                           | 0.0660                                                            | 0.1663                                                            |
| Largest diff peak/hole, e Å <sup>-3</sup>                                | 1.229 / -1.138                                                   | 1.379 / -0.579                                                    | 0.378 / -0.433                                                    |
| CCDC number                                                              | 1028017                                                          | 999869                                                            | 999870                                                            |

**Table S4.** Cont.

| [ <b>17a</b> ][SbF <sub>6</sub> ]                                | [ <b>17b</b> ][SbF <sub>6</sub> ]·CH <sub>2</sub> Cl <sub>2</sub>                | [ <b>17c</b> ][SbF <sub>6</sub> ]·NCCH <sub>2</sub> CH <sub>3</sub> |
|------------------------------------------------------------------|----------------------------------------------------------------------------------|---------------------------------------------------------------------|
| C <sub>48</sub> H <sub>50</sub> F <sub>6</sub> S <sub>2</sub> Sb | C <sub>49</sub> H <sub>52</sub> Cl <sub>2</sub> F <sub>6</sub> SbSe <sub>2</sub> | C <sub>51</sub> H <sub>55</sub> F <sub>6</sub> NSbTe <sub>2</sub>   |
| 926.75                                                           | 1105.48                                                                          | 1172.91                                                             |
| monoclinic                                                       | monoclinic                                                                       | monoclinic                                                          |
| 0.1×0.05×0.05                                                    | 0.7×0.6×0.3                                                                      | 1.0×0.2×0.2                                                         |
| P2 <sub>1</sub> /n                                               | P2 <sub>1</sub> /c                                                               | P2 <sub>1</sub> /c                                                  |
| 16.170(3)                                                        | 19.147(6)                                                                        | 19.854(5)                                                           |
| 15.837(3)                                                        | 15.238(5)                                                                        | 14.726(3)                                                           |
| 17.339(4)                                                        | 16.653(9)                                                                        | 17.178(9)                                                           |
| 90                                                               | 90                                                                               | 90                                                                  |
| 92.97(3)                                                         | 90.08(3)                                                                         | 92.07(4)                                                            |
| 90                                                               | 90                                                                               | 90                                                                  |
| 4434(2)                                                          | 4859(3)                                                                          | 5019(3)                                                             |
| 4                                                                | 4                                                                                | 4                                                                   |
| 1.388                                                            | 1.511                                                                            | 1.552                                                               |
| 0.774                                                            | 2.231                                                                            | 1.745                                                               |
| 1900                                                             | 2212                                                                             | 2308                                                                |
| 2.61 to 27.50                                                    | 2.13 to 25.02                                                                    | 2.50 to 22.51                                                       |
| −17 ≤ h ≤ 17                                                     | −22 ≤ h ≤ 22                                                                     | −21 ≤ h ≤ 13                                                        |
| −17 ≤ k ≤ 17                                                     | −18 ≤ k ≤ 14                                                                     | −13 ≤ k ≤ 15                                                        |
| −19 ≤ l ≤ 29                                                     | −19 ≤ l ≤ 17                                                                     | −18 ≤ l ≤ 18                                                        |
| 141590                                                           | 10289                                                                            | 7572                                                                |
| 99.7%                                                            | 98.7%                                                                            | 99.8%                                                               |
| 6341                                                             | 8445                                                                             | 3281                                                                |
| 3793                                                             | 4836                                                                             | 2304                                                                |
| 526                                                              | 563                                                                              | 281                                                                 |
| 1.024                                                            | 1.017                                                                            | 0.985                                                               |
| 0.0543                                                           | 0.0705                                                                           | 0.0523                                                              |
| 0.1195                                                           | 0.1879                                                                           | 0.1346                                                              |
| 0.925 / −0.430                                                   | 1.216 / −1.277                                                                   | 1.516 / −0.988                                                      |
| 999871                                                           | 999872                                                                           | 999873                                                              |

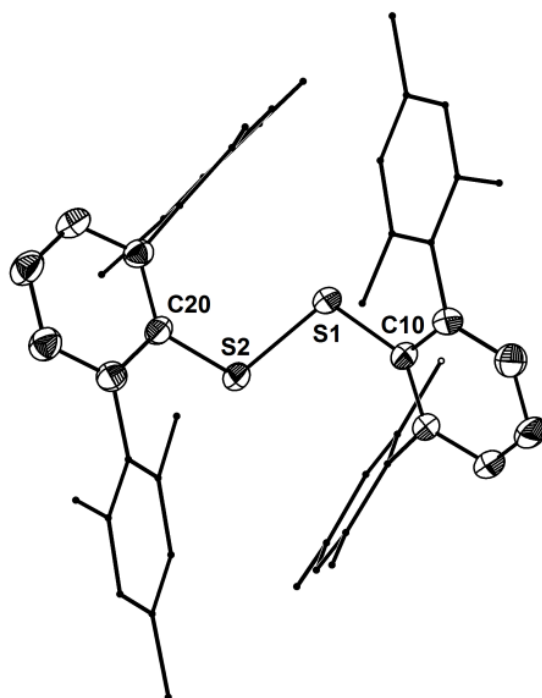

**Figure S14.** Molecular structure of **16a**; thermal ellipsoids are set at 30% probability.

---

**Table S5.** Calculated and experimental structure data of the (neutral) diaryldichalcogens.

|             | Method             | (PhS) <sub>2</sub> ( <b>1a</b> )  | (C <sub>6</sub> F <sub>5</sub> S) <sub>2</sub> ( <b>13a</b> )  |
|-------------|--------------------|-----------------------------------|----------------------------------------------------------------|
| E [a.u.]    | B3LYP/6-311+G(d,p) | -1259.84941                       | -2252.43842                                                    |
|             | B3LYP/cc-pvTZ      | -1259.91375                       | -2252.57201                                                    |
| E-E [pm]    | B3LYP/6-311+G(d,p) | 213.0                             | 209.2                                                          |
|             | B3LYP/cc-pvTZ      | 205.5                             | 207.2                                                          |
| E-C [pm]    | X-ray structure    | 202.7 <sup>S14</sup>              | 205.9 <sup>S15</sup>                                           |
|             | B3LYP/6-311+G(d,p) | 179.5                             | 179.5                                                          |
|             | B3LYP/cc-pvTZ      | 179.5                             | 179.1                                                          |
| E-E-C [°]   | X-ray structure    | 178.9 <sup>S14</sup>              | 177.0 <sup>S15</sup>                                           |
|             | B3LYP/6-311+G(d,p) | 104.6                             | 106.1                                                          |
|             | B3LYP/cc-pvTZ      | 106.8                             | 106.6                                                          |
| C-E-E-C [°] | X-ray structure    | 106.1 <sup>S14</sup>              | 101.5 <sup>S15</sup>                                           |
|             | B3LYP/6-311+G(d,p) | 82.5                              | 103.8                                                          |
|             | B3LYP/cc-pvTZ      | 90.8                              | 106.6                                                          |
|             | X-ray structure    | 84.3 <sup>S14</sup>               | 76.5 <sup>S15</sup>                                            |
|             | Method             | (PhSe) <sub>2</sub> ( <b>1b</b> ) | (C <sub>6</sub> F <sub>5</sub> Se) <sub>2</sub> ( <b>13b</b> ) |
| E [a.u.]    | B3LYP/6-311+G(d,p) | -5266.52869                       | -6259.13448                                                    |
|             | B3LYP/cc-pvTZ      | -5266.73608                       | -6259.40913                                                    |
| E-E [pm]    | B3LYP/6-311+G(d,p) | 234.3                             | 237.7                                                          |
|             | B3LYP/cc-pvTZ      | 233.2                             | 236.6                                                          |
| E-C [pm]    | X-ray structure    | 230.7 <sup>S14</sup>              | 231.9 <sup>S15</sup>                                           |
|             | B3LYP/6-311+G(d,p) | 195.2                             | 193.4                                                          |
|             | B3LYP/cc-pvTZ      | 194.7                             | 192.9                                                          |
| E-E-C [°]   | X-ray structure    | 194.2 <sup>S14</sup>              | 191.0 <sup>S15</sup>                                           |
|             | B3LYP/6-311+G(d,p) | 104.1                             | 101.4                                                          |
|             | B3LYP/cc-pvTZ      | 104.5                             | 101.9                                                          |
| C-E-E-C [°] | X-ray structure    | 103.5 <sup>S14</sup>              | 98.7 <sup>S15</sup>                                            |
|             | B3LYP/6-311+G(d,p) | 91.4                              | 87.5                                                           |
|             | B3LYP/cc-pvTZ      | 91.5                              | 89.6                                                           |
|             | X-ray structure    | 85.4 <sup>S14</sup>               | 75.3 <sup>S15</sup>                                            |
|             | Method             | (PhTe) <sub>2</sub> ( <b>1c</b> ) | (C <sub>6</sub> F <sub>5</sub> Te) <sub>2</sub> ( <b>13c</b> ) |
| E [a.u.]    | B3LYP/6-311+G(d,p) | -479.60581                        | -1472.21825                                                    |
|             | B3LYP/cc-pvTZ      | -479.64947                        | -1472.32215                                                    |
| E-E [pm]    | B3LYP/6-311+G(d,p) | 268.2                             | 270.1                                                          |
|             | B3LYP/cc-pvTZ      | 268.3                             | 270.8                                                          |
| E-C [pm]    | X-ray structure    | 270.9 <sup>S14</sup>              | 212.6 <sup>S16</sup>                                           |
|             | B3LYP/6-311+G(d,p) | 213.4                             | 212.6                                                          |
|             | B3LYP/cc-pvTZ      | 213.7                             | 213.3                                                          |
| E-E-C [°]   | X-ray structure    | 212.0 <sup>S14</sup>              | 212.4 <sup>S16</sup>                                           |
|             | B3LYP/6-311+G(d,p) | 102.3                             | 100.1                                                          |
|             | B3LYP/cc-pvTZ      | 102.5                             | 103.2                                                          |
| C-E-E-C [°] | X-ray structure    | 100.6 <sup>S14</sup>              | 98.6 <sup>S16</sup>                                            |
|             | B3LYP/6-311+G(d,p) | 92.7                              | 88.7                                                           |
|             | B3LYP/cc-pvTZ      | 92.3                              | 112.0                                                          |
|             | X-ray structure    | 90.7 <sup>S14</sup>               | 91.8 <sup>S16</sup>                                            |

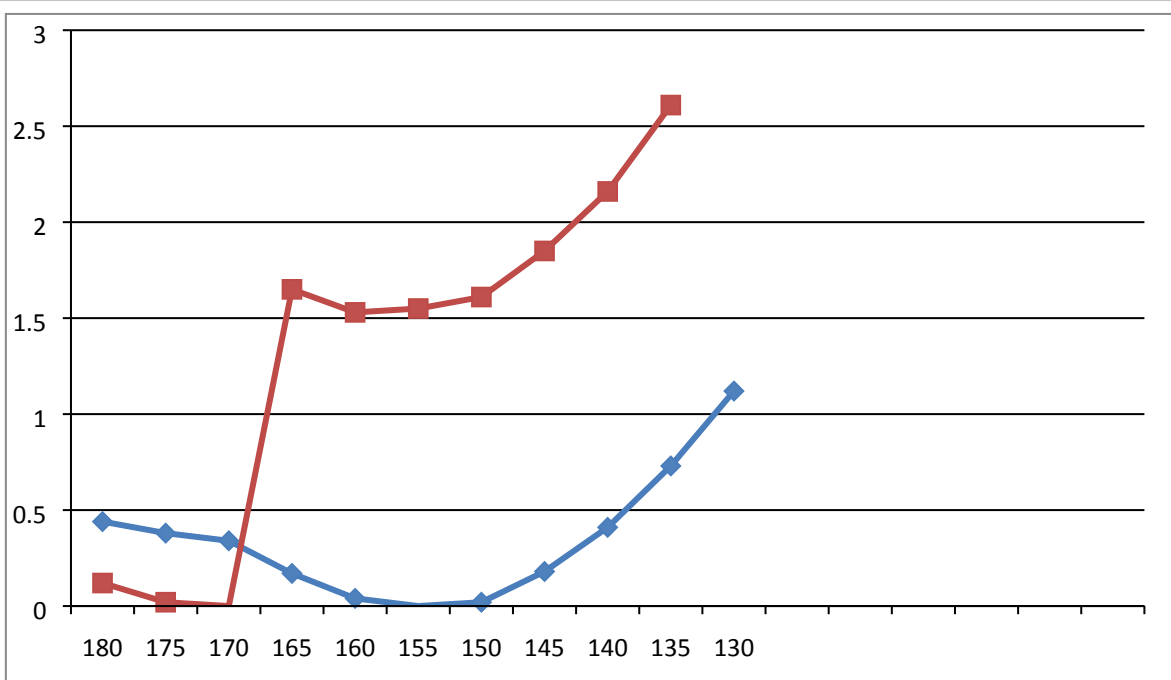

**Figure S15.** Relaxed potential energy surface scan considering the transitions between the C<sub>2</sub> and the C<sub>s</sub> symmetric structures of (C<sub>6</sub>H<sub>5</sub>S)<sub>2</sub>•<sup>+</sup> (**2a**, blue) and (C<sub>6</sub>F<sub>5</sub>S)<sub>2</sub>•<sup>+</sup> (**14a**, red) by calculation of relative energies (kcal / mol) at fixed C-S-S-C dihedral angles (varied in 5° steps).

**Table S6.** Calculated energies (a.u.) of the diphenyl-dichalcogen radical cations and their energetic difference (kcal / mol) between C<sub>s</sub> and C<sub>2</sub> (C<sub>2h</sub> for **14c**) symmetry.

|                                                                                 | E <sub>h</sub> (a.u.) C <sub>s</sub><br>symmetry | E <sub>h</sub> (a.u.) C <sub>2</sub><br>symmetry | ΔE (kcal/mol) |
|---------------------------------------------------------------------------------|--------------------------------------------------|--------------------------------------------------|---------------|
| [(PhS) <sub>2</sub> ] <sup>•+</sup> ( <b>2a</b> )                               |                                                  |                                                  |               |
| B3LYP/6-311+G(d,p)                                                              | -1259.57331                                      | -1259.57403                                      | 0.45          |
| B3LYP/cc-pvTZ                                                                   | -1259.64224                                      | -1259.64313                                      | 0.55          |
| MPW1K/6-311+G(d,p)                                                              | -1259.52391                                      | -1259.52595                                      | 1.28          |
| MPW1K/cc-pvTZ                                                                   | -1259.58801                                      | -1259.59017                                      | 1.36          |
| [(C <sub>6</sub> F <sub>5</sub> S) <sub>2</sub> ] <sup>•+</sup> ( <b>14a</b> )  |                                                  |                                                  |               |
| B3LYP/6-311+G(d,p)                                                              | -2251.13065                                      | -2252.12837                                      | -1.43         |
| B3LYP/cc-pvTZ                                                                   | -2252.27391                                      | -2251.27178                                      | -1.33         |
| MPW1K/6-311+G(d,p)                                                              | -2252.05605                                      | -2252.05451                                      | -0.97         |
| MPW1K/cc-pvTZ                                                                   | -2251.19019                                      | -2252.18898                                      | -0.95         |
| [(PhSe) <sub>2</sub> ] <sup>•+</sup> ( <b>2b</b> )                              |                                                  |                                                  |               |
| B3LYP/6-311+G(d,p)                                                              | -5266.26096                                      | -5266.26147                                      | 0.32          |
| B3LYP/cc-pvTZ                                                                   | -5266.46995                                      | -5266.47045                                      | 0.31          |
| B3LYP/6-311+G(d,p)/ecp <sup>a</sup>                                             | -481.88304                                       | -481.88352                                       | 0.31          |
| [(C <sub>6</sub> F <sub>5</sub> Se) <sub>2</sub> ] <sup>•+</sup> ( <b>14b</b> ) |                                                  |                                                  |               |
| B3LYP/6-311+G(d,p)                                                              | -6258.82533                                      | -6258.82262                                      | -1.71         |
| B3LYP/cc-pvTZ                                                                   | -6259.10831                                      | -6259.10581                                      | -1.56         |
| B3LYP/6-311+G(d,p)/ecp <sup>a</sup>                                             | -1474.44816                                      | -1474.44536                                      | -1.74         |
| [(PhTe) <sub>2</sub> ] <sup>•+</sup> ( <b>2c</b> )                              |                                                  |                                                  |               |
| B3LYP/6-311+G(d,p)/ecp <sup>b</sup>                                             | -479.34761                                       | -479.34854                                       | 0.59          |
| B3LYP/cc-pvTZ/ecp <sup>b</sup>                                                  | -479.39169                                       | -479.39275                                       | 0.61          |
| [(C <sub>6</sub> F <sub>5</sub> Te) <sub>2</sub> ] <sup>•+</sup> ( <b>14c</b> ) |                                                  |                                                  |               |
| B3LYP/6-311+G(d,p)/ecp <sup>b</sup>                                             | -1471.92486                                      | -1471.92528                                      | 0.26          |
| B3LYP/cc-pvTZ/ecp <sup>b</sup>                                                  | -1472.04091                                      | -1472.04151                                      | 0.37          |

(a) Se: rel. corrected core potential for 28 electrons, 14s10p2d1f[3s3p2d1f] basis set.

(b) Te: rel. corrected core potential for 46 electrons, 15s11p3d1f[3s3p2d1f] basis set.

**Table S7.** Structural data of the diaryldichalcogen radical cations in  $C_s$  and  $C_2$  ( $C_{2h}$  for **14c**) symmetry, calculated at the B3LYP/cc-pvT level of theory.

| [(PhS) <sub>2</sub> ] <sup>•+</sup> ( <b>2a</b> ) |              |       | [(C <sub>6</sub> F <sub>5</sub> S) <sub>2</sub> ] <sup>•+</sup> ( <b>14a</b> ) |       |
|---------------------------------------------------|--------------|-------|--------------------------------------------------------------------------------|-------|
| Symmetry                                          | $C_s$        | $C_2$ | $C_s$                                                                          | $C_2$ |
| E-E [pm]                                          | 205.9        | 204.9 | 208.5                                                                          | 206.7 |
| E-C [pm]                                          | 178.3, 174.3 | 176.5 | 175.8, 173.7                                                                   | 175.4 |
| E-E-C [°]                                         | 99.3, 107.0  | 102.8 | 97.2, 109.1                                                                    | 101.8 |
| C-E-E-C [°]                                       | 180.0        | 156.9 | 180.0                                                                          | 159.1 |

  

| (PhSe) <sub>2</sub> <sup>•+</sup> ( <b>2b</b> ) |              |       | (C <sub>6</sub> F <sub>5</sub> Se) <sub>2</sub> <sup>•+</sup> ( <b>14b</b> ) |       |
|-------------------------------------------------|--------------|-------|------------------------------------------------------------------------------|-------|
| Symmetry                                        | $C_s$        | $C_2$ | $C_s$                                                                        | $C_2$ |
| E-E [pm]                                        | 233.3        | 232.4 | 235.4                                                                        | 234.3 |
| E-C [pm]                                        | 192.7, 189.8 | 191.5 | 190.5, 189.1                                                                 | 190.2 |
| E-E-C [°]                                       | 97.0, 105.0  | 100.0 | 94.8, 106.4                                                                  | 99.7  |
| C-E-E-C [°]                                     | 180.0        | 161.4 | 180.0                                                                        | 166.4 |

  

| (PhTe) <sub>2</sub> <sup>•+</sup> ( <b>2c</b> ) |              |       | (C <sub>6</sub> F <sub>5</sub> Te) <sub>2</sub> <sup>•+</sup> ( <b>14c</b> ) |          |
|-------------------------------------------------|--------------|-------|------------------------------------------------------------------------------|----------|
| Symmetry                                        | $C_s$        | $C_2$ | $C_s$                                                                        | $C_{2h}$ |
| E-E [pm]                                        | 268.7        | 268.3 | 270.0                                                                        | 271.5    |
| E-C [pm]                                        | 211.1, 209.1 | 210.4 | 210.0, 209.0                                                                 | 208.8    |
| E-E-C [°]                                       | 94.2, 103.0  | 97.4  | 92.5, 102.2                                                                  | 102.2    |
| C-E-E-C [°]                                     | 180.0        | 167.9 | 180.0                                                                        | 180.0    |

**Table S8.** Calculated ionization energies (eV) of the diaryldichalcogens **1a-c** and **13a-c**.

|                                                                | B3LYP/6-311+G(d,p) Te: core<br>pot. 15s11p3d1f[3s3p2d1f] | B3LYP/cc-pvTZ Te: core pot.<br>15s11p3d1f[3s3p2d1f] |
|----------------------------------------------------------------|----------------------------------------------------------|-----------------------------------------------------|
| (PhS) <sub>2</sub> ( <b>1a</b> )                               | 7.49                                                     | 7.38                                                |
| (C <sub>6</sub> F <sub>5</sub> S) <sub>2</sub> ( <b>13a</b> )  | 8.37                                                     | 8.11                                                |
| (PhSe) <sub>2</sub> ( <b>1b</b> )                              | 7.27                                                     | 7.23                                                |
| (C <sub>6</sub> F <sub>5</sub> Se) <sub>2</sub> ( <b>13b</b> ) | 8.41                                                     | 8.16                                                |
| (PhTe) <sub>2</sub> ( <b>1c</b> )                              | 7.01                                                     | 6.98                                                |
| (C <sub>6</sub> F <sub>5</sub> Te) <sub>2</sub> ( <b>13c</b> ) | 7.79                                                     | 7.64                                                |



**Table S9.** Wiberg Bond Indices, Natural Charges, and Mullikan Charges at the chalcogen atoms of **1a-c**, **2a-c**, **13a-c** and **14a-c**.

| (RE) <sub>2</sub><br>[(RE) <sub>2</sub> ] <sup>•+</sup> | <b>1a and 2a</b><br>E = S<br>R = Ph | <b>13a and 14a</b><br>E = S<br>R = C <sub>6</sub> F <sub>5</sub> | <b>1b and 2b</b><br>E = Se<br>R = Ph | <b>13b and 14b</b><br>E = Se<br>R = C <sub>6</sub> F <sub>5</sub> | <b>1c and 2c</b><br>E = Te<br>R = Ph | <b>13c and 14c</b><br>E = Te<br>R = C <sub>6</sub> F <sub>5</sub> |
|---------------------------------------------------------|-------------------------------------|------------------------------------------------------------------|--------------------------------------|-------------------------------------------------------------------|--------------------------------------|-------------------------------------------------------------------|
| WBI (E-E)                                               | 1.077<br><i>1.216</i>               | 1.057<br><i>1.176</i>                                            | 1.060<br><i>1.246</i>                | 1.001<br><i>1.221</i>                                             | 1.085<br><i>1.315</i>                | 1.058<br><i>1.282</i>                                             |
| Natural<br>charges (E)                                  | 0.149<br><i>0.320, 0.470</i>        | 0.198<br><i>0.409, 0.486</i>                                     | 0.191<br><i>0.401, 0.552</i>         | 0.223<br><i>0.509, 0.571</i>                                      | 0.308<br><i>0.574, 0.712</i>         | 0.367<br><i>0.723</i>                                             |
| Mullikan<br>charge (E)                                  | -0.010<br><i>0.143, 0.255</i>       | 0.047<br><i>0.243, 0.298</i>                                     | 0.027<br><i>0.242, 0.368</i>         | 0.101<br><i>0.362, 0.423</i>                                      | 0.001<br><i>0.222, 0.305</i>         | 0.072<br><i>0.398</i>                                             |

Neutral compounds in C<sub>2</sub> symmetry; Radical cations in C<sub>s</sub> symmetry, except (C<sub>6</sub>F<sub>5</sub>Te)<sub>2</sub><sup>•+</sup> (**14c**) which has C<sub>2h</sub> symmetry. Second numbers refer to the chalcogen atoms that are linked to the in-plane phenyl rings in case of C<sub>s</sub> symmetry. Method Becke3LYP, cc-pVTZ basis sets.

## References

- S1 A. McKillop, D. Koyunco, A. Krief, W. Dumont, P. Renier, M. Tarabelsi, *Tetrahedron Lett.*, 1990, **31**, 5007.  
S2 T. M. Klapötke, B. Krumm, K. Polborn, *Eur. J. Inorg. Chem.*, 1999, 1359.  
S3 (a) R. Kasemann, D. Naumann, *J. Fluorine Chem.*, 1990, **48**, 207; (b) T. M. Klapötke, B. Krumm, P. Mayer, K. Polborn, O. P. Ruscitti J., *Fluorine Chem.*, 2001, **112**, 207; (c) T. M. Klapötke, B. Krumm, P. Mayer, D. Naumann, I. Schwab J., *Fluorine Chem.*, 2004, **125**, 997.  
S4 S. Stoll, A. Schweiger, *J. Magn. Reson.*, 2006, **178**, 42.  
S5 G.M. Sheldrick, *Acta Cryst.*, 2008, **A64**, 112.  
S6 K. Brandenburg, H. Putz DIAMOND V3.1d. Crystal Impact GbR, Bonn, Germany, 2006.  
S7 F. Neese, *Wiley Interdiscip. Rev.: Comput. Mol. Sci.*, 2012, **2**, 73. D. Ganyushin, F. Neese, *J. Chem. Phys.*, 2013 **138**, 104113.  
S8 TURBOMOLE V6.4, a development of Universität Karlsruhe (TH) and Forschungszentrum Karlsruhe GmbH, 1989–2007, TURBOMOLE GmbH, since 2007. Available from <http://www.turbomole.com>, 2012.).  
S9 (a) A. D. Becke, *J. Chem. Phys.*, 1993, **98**, 5648; (b) F. Weigend, R. Ahlrichs, *Phys. Chem. Chem. Phys.* 2005, **7**, 3297; (c) F. Weigend, *Phys. Chem. Chem. Phys.* 2006, **8**, 1057.  
S10 Gaussian 09, Revision A.02, M. J. Frisch, G. W. Trucks, H. B. Schlegel, G. E. Scuseria, M. A. Robb, J. R. Cheeseman, G. Scalmani, V. Barone, B. Mennucci, G. A. Petersson, H. Nakatsuji, M. Caricato, X. Li, H. P. Hratchian, A. F. Izmaylov, J. Bloino, G. Zheng, J. L. Sonnenberg, M. Hada, M. Ehara, K. Toyota, R. Fukuda, J. Hasegawa, M. Ishida, T. Nakajima, Y. Honda, O. Kitao, H. Nakai, T. Vreven, J. A. Montgomery, Jr., J. E. Peralta, F. Ogliaro, M. Bearpark, J. J. Heyd, E. Brothers, K. N. Kudin, V. N. Staroverov, R. Kobayashi, J. Normand, K. Raghavachari, A. Rendell, J. C. Burant, S. S. Iyengar, J. Tomasi, M. Cossi, N. Rega, J. M. Millam, M. Klene, J. E. Knox, J. B. Cross, V. Bakken, C. Adamo, J. Jaramillo, R. Gomperts, R. E. Stratmann, O. Yazyev, A. J. Austin, R. Cammi, C. Pomelli, J. W. Ochterski, R. L. Martin, K. Morokuma, V. G. Zakrzewski, G. A. Voth, P. Salvador, J. J. Dannenberg, S. Dapprich, A. D. Daniels, O. Farkas, J. B. Foresman, J. V. Ortiz, J. Cioslowski, D. J. Fox, Gaussian, Inc., Wallingford CT, 2009.  
S11 B.J. Lynch, P.L. Fast, M. Harris, D.G. Truhlar, *J. Chem. Phys. A*, 2000, **104**, 4811.  
S12 J.M.L. Martin, A. Sundermann, *J. Chem. Phys.*, 2001, **114**, 3408.  
S13 U. Fleischer, unpublished results, as communicated by M. Kaupp.  
S14 A.-L. Fuller, L.S. Scott-Hayward, Y. Li, M. Bühl, A.M.Z. Slawin, J. D. Woollins, *J. Am. Chem. Soc.*, 2010, **132**, 5799.  
S15 I.Bagryanskaya, Y.V. Gatilov, E. Lork, R. Mews, A.V. Zibarev, *J. Fluor. Chem.*, 2006, **127**, 746.  
S16 T.M. Klapötke, B. Krumm, P. Mayer, K. Polborn, O.P. Ruscitti, *J. Fluor. Chem.*, 2001, **112**, 207.
